# Supplementary material
Source: MDPI journal article supplement (https://www.mdpi.com/1424-2818/15/2/293)
Supplement: s1 [file s1]

## Supplementary materials

**Table S1.** Individual size, age, and growth characteristics of *M. margaritifera*.

| № of specimen              | <i>n</i> | <i>L</i> , mm | <i>T</i> , year | <i>a</i> , year <sup>-1</sup> | <i>d</i> , mm/year | <i>k</i> , year <sup>-1</sup> | <i>L</i> <sub>∞</sub> , mm |
|----------------------------|----------|---------------|-----------------|-------------------------------|--------------------|-------------------------------|----------------------------|
| <b>Kem River (estuary)</b> |          |               |                 |                               |                    |                               |                            |
| Ke-01                      | 26       | 77.3          | 37              | 0.082 ± 0.009                 | 6.5 ± 0.6          | 0.085 ± 0.010                 | 79.3 ± 1.5                 |
| Ke-02                      | 31       | 91.1          | 44              | 0.084 ± 0.006                 | 7.8 ± 0.4          | 0.087 ± 0.006                 | 93.1 ± 1.2                 |
| Ke-03                      | 28       | 89.9          | 33              | 0.071 ± 0.010                 | 6.5 ± 0.7          | 0.074 ± 0.010                 | 91.3 ± 2.3                 |
| Ke-04                      | 24       | 85.4          | 32              | 0.096 ± 0.005                 | 8.5 ± 0.3          | 0.101 ± 0.005                 | 88.7 ± 0.9                 |
| Ke-05                      | 22       | 84.9          | 29              | 0.092 ± 0.011                 | 8.2 ± 0.7          | 0.097 ± 0.012                 | 89.0 ± 2.1                 |
| Ke-06                      | 33       | 86.5          | 42              | 0.080 ± 0.007                 | 7.0 ± 0.5          | 0.083 ± 0.008                 | 88.2 ± 1.3                 |
| Ke-07                      | 23       | 85.0          | 29              | 0.113 ± 0.006                 | 9.7 ± 0.4          | 0.120 ± 0.007                 | 86.4 ± 0.9                 |
| Ke-08                      | 20       | 86.4          | 27              | 0.102 ± 0.008                 | 9.2 ± 0.6          | 0.107 ± 0.009                 | 90.3 ± 1.5                 |
| Ke-09                      | 20       | 90.0          | 37              | 0.095 ± 0.007                 | 9.1 ± 0.5          | 0.100 ± 0.008                 | 95.1 ± 1.5                 |
| Ke-10                      | 28       | 83.0          | 37              | 0.071 ± 0.004                 | 6.3 ± 0.3          | 0.074 ± 0.005                 | 88.7 ± 1.2                 |
| Ke-11                      | 28       | 91.3          | 34              | 0.065 ± 0.006                 | 6.5 ± 0.5          | 0.068 ± 0.007                 | 99.2 ± 2.2                 |
| Ke-12                      | 21       | 85.5          | 36              | 0.076 ± 0.008                 | 7.0 ± 0.6          | 0.079 ± 0.009                 | 91.8 ± 1.9                 |
| Ke-13                      | 26       | 80.4          | 30              | 0.066 ± 0.005                 | 5.8 ± 0.3          | 0.069 ± 0.005                 | 87.8 ± 1.4                 |
| Ke-14                      | 20       | 83.0          | 27              | 0.100 ± 0.014                 | 8.6 ± 1.0          | 0.105 ± 0.016                 | 86.1 ± 2.3                 |
| Ke-15                      | 20       | 81.9          | 27              | 0.117 ± 0.007                 | 10.0 ± 0.5         | 0.125 ± 0.008                 | 84.8 ± 0.9                 |

| Vozhma River |    |       |     |                   |               |                   |                  |
|--------------|----|-------|-----|-------------------|---------------|-------------------|------------------|
| Vo-01        | 89 | 126.4 | 112 | $0.041 \pm 0.002$ | $5.0 \pm 0.2$ | $0.042 \pm 0.002$ | $122.2 \pm 0.6$  |
| Vo-02        | 93 | 131.2 | 110 | $0.038 \pm 0.002$ | $4.8 \pm 0.3$ | $0.039 \pm 0.003$ | $126.5 \pm 1.1$  |
| Vo-03        | 73 | 123.8 | 95  | $0.033 \pm 0.002$ | $4.2 \pm 0.2$ | $0.034 \pm 0.002$ | $124.8 \pm 1.5$  |
| Vo-04        | 27 | 103.0 | 33  | $0.059 \pm 0.004$ | $6.9 \pm 0.3$ | $0.061 \pm 0.004$ | $115.9 \pm 2.5$  |
| Vo-05        | 26 | 104.5 | 32  | $0.073 \pm 0.004$ | $8.1 \pm 0.4$ | $0.076 \pm 0.005$ | $111.8 \pm 1.7$  |
| Vo-06        | 35 | 103.7 | 43  | $0.046 \pm 0.004$ | $5.4 \pm 0.3$ | $0.047 \pm 0.005$ | $118.1 \pm 3.4$  |
| Vo-07        | 46 | 114.4 | 55  | $0.055 \pm 0.003$ | $6.3 \pm 0.3$ | $0.056 \pm 0.004$ | $115.4 \pm 1.5$  |
| Vo-08        | 54 | 115.7 | 64  | $0.057 \pm 0.003$ | $6.5 \pm 0.3$ | $0.059 \pm 0.004$ | $112.9 \pm 1.1$  |
| Vo-09        | 26 | 107.9 | 34  | $0.055 \pm 0.006$ | $6.8 \pm 0.5$ | $0.056 \pm 0.006$ | $124.7 \pm 3.9$  |
| Vo-10        | 14 | 66.6  | 19  | $0.060 \pm 0.016$ | $5.7 \pm 0.7$ | $0.061 \pm 0.017$ | $95.6 \pm 10.4$  |
| Vo-11        | 9  | 74.7  | 13  | $0.084 \pm 0.018$ | $9.0 \pm 0.9$ | $0.087 \pm 0.019$ | $107.4 \pm 9.6$  |
| Vo-12        | 25 | 98.9  | 31  | $0.083 \pm 0.006$ | $8.5 \pm 0.4$ | $0.087 \pm 0.006$ | $102.3 \pm 1.6$  |
| Vo-13        | 33 | 98.6  | 40  | $0.046 \pm 0.005$ | $5.3 \pm 0.4$ | $0.047 \pm 0.005$ | $115.1 \pm 4.0$  |
| Vo-14        | 11 | 78.0  | 15  | $0.041 \pm 0.016$ | $6.4 \pm 0.9$ | $0.042 \pm 0.017$ | $157.0 \pm 29.8$ |
| Vo-15        | 8  | 66.0  | 12  | $0.065 \pm 0.017$ | $8.2 \pm 0.7$ | $0.068 \pm 0.018$ | $125.8 \pm 17.2$ |
| Vo-16        | 10 | 50.9  | 16  | $0.045 \pm 0.017$ | $4.6 \pm 0.6$ | $0.046 \pm 0.018$ | $101.1 \pm 17.9$ |

| Ukhta River |    |       |    |                   |                |                   |                 |
|-------------|----|-------|----|-------------------|----------------|-------------------|-----------------|
| Ukh-01      | 15 | 106.9 | 20 | $0.100 \pm 0.006$ | $11.7 \pm 0.5$ | $0.106 \pm 0.007$ | $116.6 \pm 2.0$ |
| Ukh-02      | 32 | 112.4 | 40 | $0.069 \pm 0.004$ | $7.9 \pm 0.3$  | $0.071 \pm 0.004$ | $115.9 \pm 1.4$ |

|        |    |       |    |                   |                |                   |                 |
|--------|----|-------|----|-------------------|----------------|-------------------|-----------------|
| Ukh-03 | 17 | 99.4  | 21 | $0.094 \pm 0.007$ | $10.3 \pm 0.5$ | $0.098 \pm 0.008$ | $110.4 \pm 2.7$ |
| Ukh-04 | 35 | 114.3 | 40 | $0.092 \pm 0.004$ | $10.1 \pm 0.4$ | $0.096 \pm 0.004$ | $109.8 \pm 0.7$ |
| Ukh-05 | 21 | 104.7 | 26 | $0.074 \pm 0.005$ | $8.7 \pm 0.4$  | $0.076 \pm 0.005$ | $117.8 \pm 2.5$ |
| Ukh-06 | 17 | 90.9  | 20 | $0.119 \pm 0.008$ | $11.2 \pm 0.6$ | $0.127 \pm 0.009$ | $94.2 \pm 1.6$  |
| Ukh-07 | 17 | 103.8 | 21 | $0.103 \pm 0.006$ | $11.5 \pm 0.4$ | $0.109 \pm 0.007$ | $111.8 \pm 1.9$ |
| Ukh-08 | 33 | 114.7 | 40 | $0.076 \pm 0.004$ | $8.6 \pm 0.4$  | $0.079 \pm 0.005$ | $114.0 \pm 1.2$ |
| Ukh-09 | 16 | 100.4 | 21 | $0.114 \pm 0.013$ | $11.9 \pm 0.9$ | $0.121 \pm 0.014$ | $104.5 \pm 3.1$ |
| Ukh-10 | 16 | 94.4  | 21 | $0.117 \pm 0.010$ | $11.4 \pm 0.7$ | $0.124 \pm 0.011$ | $98.1 \pm 2.2$  |
| Ukh-11 | 15 | 99.7  | 19 | $0.100 \pm 0.010$ | $11.1 \pm 0.7$ | $0.105 \pm 0.011$ | $111.5 \pm 3.3$ |
| Ukh-12 | 16 | 102.8 | 20 | $0.094 \pm 0.009$ | $10.9 \pm 0.7$ | $0.098 \pm 0.010$ | $116.5 \pm 3.6$ |
| Ukh-13 | 16 | 91.9  | 21 | $0.089 \pm 0.011$ | $9.3 \pm 0.7$  | $0.093 \pm 0.012$ | $104.9 \pm 4.0$ |
| Ukh-14 | 16 | 96.5  | 18 | $0.108 \pm 0.010$ | $11.6 \pm 0.7$ | $0.115 \pm 0.012$ | $106.5 \pm 3.3$ |
| Ukh-15 | 14 | 96.6  | 18 | $0.081 \pm 0.009$ | $9.8 \pm 0.6$  | $0.085 \pm 0.010$ | $120.5 \pm 5.2$ |

Notes:  $n$  - the number of annual rings measured;  $L$  - the shell length.  $T$  - the age of the individual;  $a$ ,  $d$  - the coefficients of the growth equation (2);  $k$ ,  $L_{\infty}$  - the coefficients of the growth equation (1).
